# Supplementary material
Source: PubMed Central journal article supplement (PMC6370291)
Supplement: NIHMS972549-supplement-supplemental_tables.pdf [file NIHMS972549-supplement-supplemental_tables.pdf]

**SUPPLEMENT TABLE 1. FI questions used in National GI Survey.**

---

**FI History Questions**

---

How often do you have bowel incontinence that is have an accident because you could not make it to the bathroom in time?

- Less than one day a month
  - One day a month
  - Two to three days a month
  - One day a week
  - More than one day a week but not every day
  - Every day of the week
- 

What is the amount of stool leakage you usually have?

- Small amount – like staining underpants only
  - Moderate amount – more than staining but less than a full bowel movement
  - Large amount – a full bowel movement
  - Variable amount – the amount changes from time to time
- 

For the times you had bowel incontinence how often did you feel a warning the stool was about to come out like an urge to have a bowel movement but you still could not make it to the bathroom in time?

- Never – I do not feel a warning the stool is about to come out
  - Only rarely feel a warning
  - Only sometimes feel a warning
  - Usually feel a warning – but not always
  - Always feel a warning
- 

How often did you think you were going to pass gas but passed stool or liquid instead?

- Never
  - Rarely
  - Sometimes
  - Often
  - Always
- 

How often do you wear a pad or diaper because of bowel incontinence?

- Never
  - Rarely
  - Sometimes
  - Often
  - Always
-

---

How much does the bowel incontinence interfere with your day-to-day activities?

- Not at all
- A little bit
- Somewhat
- Quite a bit
- Very much

---

Has your anus ever been injured or have you ever had surgery in that area?

- No
- Yes
- Unsure

---

Have you had vaginal deliveries?

- No
- Yes

---

How many vaginal deliveries have you had?

- 0
- 1
- 2
- 3
- 4 or more

---

Have you had an episiotomy?

- No
- Yes
- Unsure

---

Were forceps used during your vaginal delivery?

- No
- Yes
- Unsure

---

**NIH FI PROMIS Questions**

---

In the past 7 days...How often did you have bowel incontinence - that is have an accident because you could not make it to the bathroom in time?

- No days
  - 1 day
  - 2-3 days
  - 4-5 days
  - 6-7 days
-

---

In the past 7 days...How often did you soil or dirty your underwear before getting to a bathroom?

- No days
- 1 day
- 2-3 days
- 4-5 days
- 6-7 days

---

In the past 7 days...How often did you leak stool or soil your underwear?

- No days
- 1 day
- 2-3 days
- 4-5 days
- 6-7 days

---

In the past 7 days...How often did you think you were going to pass gas but stool or liquid came out instead?

- Never
- Rarely
- Sometimes
- Often
- Always

---

FI, fecal incontinence; NIH, National Institutes of Health; PROMIS, Patient Reported Outcome Measurement Information System.

---

**SUPPLEMENT TABLE 2. Population weights based on latest U.S. Census data for age, sex, and race/ethnicity applied to sample data.**<sup>25, 26</sup>

| Race/ethnicity     | Age group (years) | Gender   |          |
|--------------------|-------------------|----------|----------|
|                    |                   | Female   | Male     |
| Non-Hispanic white | 18-24             | 0.044268 | 0.042532 |
|                    | 25-44             | 0.126480 | 0.121520 |
|                    | 45-64             | 0.094860 | 0.091140 |
|                    | 65+               | 0.050592 | 0.048608 |
| Non-Hispanic black | 18-24             | 0.008568 | 0.008232 |
|                    | 25-44             | 0.024480 | 0.023520 |
|                    | 45-64             | 0.018360 | 0.017640 |
|                    | 65+               | 0.009792 | 0.009408 |
| Latino             | 18-24             | 0.012852 | 0.012348 |
|                    | 25-44             | 0.036720 | 0.035280 |
|                    | 45-64             | 0.027540 | 0.026460 |
|                    | 65+               | 0.014688 | 0.014112 |
| Asian              | 18-24             | 0.004284 | 0.004116 |
|                    | 25-44             | 0.012240 | 0.011760 |
|                    | 45-64             | 0.009180 | 0.008820 |
|                    | 65+               | 0.004896 | 0.004704 |
| Other              | 18-24             | 0.001428 | 0.001372 |
|                    | 25-44             | 0.004080 | 0.003920 |
|                    | 45-64             | 0.003060 | 0.002940 |
|                    | 65+               | 0.001632 | 0.001568 |

**SUPPLEMENT TABLE 3. Responses to individual FI PROMIS questions among those who had FI in the past 7 days and stratified by gender.**

| Variable                                                                                                                                                | Overall (n=3094) |  | Female (n=1806) | Male (n=1288) | Ordinal OR<br>[95% CI] <sup>a</sup> |
|---------------------------------------------------------------------------------------------------------------------------------------------------------|------------------|--|-----------------|---------------|-------------------------------------|
| <i>In the past 7 days...How often did you have bowel incontinence - that is have an accident because you could not make it to the bathroom in time?</i> |                  |  |                 |               |                                     |
| No days                                                                                                                                                 | 441 (14.6%)      |  | 276 (13.4%)     | 195 (15.8%)   | 1.05 [0.90-1.23]                    |
| 1 day                                                                                                                                                   | 1279 (40.1%)     |  | 824 (44.9%)     | 455 (35.2%)   |                                     |
| 2-3 days                                                                                                                                                | 874 (29.2%)      |  | 473 (26.6%)     | 401 (31.7%)   |                                     |
| 4-5 days                                                                                                                                                | 331 (10.3%)      |  | 172 (9.3%)      | 159 (11.3%)   |                                     |
| 6-7 days                                                                                                                                                | 169 (5.9%)       |  | 91 (5.8%)       | 78 (6.1%)     |                                     |
| <i>In the past 7 days...How often did you soil or dirty your underwear before getting to a bathroom?</i>                                                |                  |  |                 |               |                                     |
| No days                                                                                                                                                 | 392 (14.2%)      |  | 210 (12.2%)     | 182 (16.3%)   | 1.01 [0.87-1.18]                    |
| 1 day                                                                                                                                                   | 1320 (40.8%)     |  | 836 (44.8%)     | 484 (36.7%)   |                                     |
| 2-3 days                                                                                                                                                | 877 (28.8%)      |  | 511 (29.3%)     | 366 (28.2%)   |                                     |
| 4-5 days                                                                                                                                                | 332 (10.7%)      |  | 161 (8.6%)      | 171 (12.9%)   |                                     |
| 6-7 days                                                                                                                                                | 173 (5.6%)       |  | 88 (5.1%)       | 85 (6.0%)     |                                     |
| <i>In the past 7 days...How often did you leak stool or soil your underwear?</i>                                                                        |                  |  |                 |               |                                     |
| No days                                                                                                                                                 | 480 (17.1%)      |  | 295 (17.2%)     | 185 (16.9%)   | 1.12 [0.96-1.30]                    |
| 1 day                                                                                                                                                   | 1222 (37.3%)     |  | 752 (39.2%)     | 470 (35.5%)   |                                     |
| 2-3 days                                                                                                                                                | 889 (29.4%)      |  | 500 (29.2%)     | 389 (29.7%)   |                                     |
| 4-5 days                                                                                                                                                | 316 (10.1%)      |  | 194 (8.9%)      | 152 (11.3%)   |                                     |
| 6-7 days                                                                                                                                                | 187 (6.1%)       |  | 95 (5.5%)       | 92 (6.6%)     |                                     |
| <i>In the past 7 days...How often did you think you were going to pass gas but stool or liquid came out instead?</i>                                    |                  |  |                 |               |                                     |
| Never                                                                                                                                                   | 382 (13.1%)      |  | 264 (13.9%)     | 118 (12.4%)   | 1.19 [1.03-1.38]                    |
| Rarely                                                                                                                                                  | 826 (26.4%)      |  | 488 (27.1%)     | 338 (25.7%)   |                                     |
| Sometimes                                                                                                                                               | 1212 (39.3%)     |  | 694 (40.0%)     | 518 (28.6%)   |                                     |
| Often                                                                                                                                                   | 527 (16.5%)      |  | 286 (14.5%)     | 241 (18.5%)   |                                     |
| Always                                                                                                                                                  | 147 (4.7%)       |  | 74 (4.5%)       | 73 (4.9%)     |                                     |

Data are presented as n (population-weighted %).

CI, confidence interval; OR, odds ratio.

<sup>a</sup> Females served as the reference group. The survey-weighted ordinal logistic regression model adjusted for age, gender, race/ethnicity, education level, marital status, employment status, household income, diarrhea within past week, constipation within past week, and presence of Crohn's disease, ulcerative colitis, Celiac disease, diabetes, HIV/AIDS, irritable bowel syndrome, and chronic idiopathic constipation.
